# Supplementary material for: Iraqi Parents’ Knowledge, Attitudes, and Practices towards Vaccinating Their Children: A Cross-Sectional Study
Source: MDPI journal article supplement (doi:10.3390/vaccines10050820), 2022-05-22
Supplement: s1 [file s1]

**Table S1. Pilot study results**

|                                                      |                     | Frequency (%) or Mean<br>( $\pm$ SD) |
|------------------------------------------------------|---------------------|--------------------------------------|
| Sex                                                  | Male                | 17 (56.7%)                           |
|                                                      | Female              | 13 (43.3%)                           |
| Age                                                  | 18-29 years         | 7 (23.3%)                            |
|                                                      | 30-39 years         | 14 (46.7%)                           |
|                                                      | 40 years or above   | 9 (30.0%)                            |
| Education                                            | High school or less | 5 (16.7%)                            |
|                                                      | Diploma             | 2 (6.7%)                             |
|                                                      | University student  | 6 (20.0%)                            |
|                                                      | Bachelor            | 11 (36.7%)                           |
|                                                      | Postgraduate        | 6 (20.0%)                            |
|                                                      | Less than 500\$     | 12 (40.0%)                           |
|                                                      | 500-1000\$          | 10 (33.3%)                           |
| Children                                             | More than 1000\$    | 0 (0.0%)                             |
|                                                      | 1                   | 7 (23.3%)                            |
|                                                      | 2                   | 8 (26.7%)                            |
|                                                      | 3                   | 5 (16.7%)                            |
|                                                      | 4 or more           | 10 (33.3%)                           |
| Children's sex                                       | Girls               | 3 (10.0%)                            |
|                                                      | Boys                | 10 (33.3%)                           |
|                                                      | Boys and girls      | 17 (56.7%)                           |
| adherence to protective practice score               |                     | 18.73 ( $\pm$ 4.21)                  |
| Knowledge score                                      |                     | 13.03 ( $\pm$ 3.06)                  |
| Have you taken or planning to take COVID-19 vaccine? | Yes                 | 27 (90.0%)                           |
|                                                      | No                  | 3 (10.0%)                            |
| Willing to vaccinate children against COVID-19       | No                  | 17 (56.7%)                           |
|                                                      | Maybe               | 4 (13.3%)                            |
|                                                      | Yes                 | 9 (30.0%)                            |

**Table S2. Knowledge towards COVID-19 and its vaccines (correct answers).**

| <b>Knowledge determinants</b>                                       | <b>Frequency (%)</b> |
|---------------------------------------------------------------------|----------------------|
| <b>What are the symptoms of COVID19?</b>                            |                      |
| Fever                                                               | 475 (96.7)           |
| Chills                                                              | 276 (56.2)           |
| Diarrhea                                                            | 365 (74.3)           |
| Cough                                                               | 432 (88.0)           |
| Otitis media                                                        | 290 (59.1)           |
| Loss of smell and taste senses                                      | 442 (90.0)           |
| No symptoms                                                         | 366 (74.5)           |
| <b>How COVID19 can be transmitted?</b>                              |                      |
| Drinking unclean water                                              | 300 (61.1)           |
| Eating unclean food                                                 | 274 (55.8)           |
| Inhalation of respiratory droplets of infected person               | 458 (93.3)           |
| Eating or touching wild animals                                     | 296 (60.3)           |
| <b>What procedures do you think may prevent COVID-19 infection?</b> |                      |
| Wearing face masks                                                  | 438 (89.2)           |
| Washing hands with regular soap                                     | 407 (82.9)           |
| Using detergents                                                    | 435 (88.6)           |
| Social distancing                                                   | 450 (91.6)           |
| Avoid touching face/mouth/nose/eyes                                 | 415 (84.5)           |
| Avoid eating meat                                                   | 357 (72.7)           |
| Consume herbs                                                       | 264 (53.8)           |
| Rote of vaccine administration                                      | 317 (64.6)           |
| Availability of medicine                                            | 294 (59.9)           |

**Table S3. Adherence to protective practices against COVID-19.**

| <b>What procedures have you taken to protect yourself from COVID19?</b> | <b>Mean<br/>(SD)</b> | <b>Never</b> | <b>Rarely</b> | <b>Sometimes</b> | <b>Most of<br/>the time</b> | <b>All the<br/>time</b> |
|-------------------------------------------------------------------------|----------------------|--------------|---------------|------------------|-----------------------------|-------------------------|
| Wearing face masks                                                      | 3.62 (1.04)          | 12 (2.4)     | 65 (13.2)     | 131 (26.7)       | 173 (35.2)                  | 110 (22.4)              |
| Washing hands with<br>regular soap                                      | 4.22 (1.00)          | 18 (3.7)     | 16 (3.3)      | 48 (9.8)         | 166 (33.8)                  | 243 (49.5)              |
| Using detergents                                                        | 3.73 (1.09)          | 19 (3.9)     | 45 (9.2)      | 126 (25.7)       | 159 (32.4)                  | 142 (28.9)              |
| Social distancing                                                       | 3.76 (1.03)          | 16 (3.3)     | 33 (6.7)      | 139 (28.3)       | 166 (33.8)                  | 137 (27.9)              |
| Avoid touching<br>face/mouth/nose/eyes                                  | 3.75 (1.11)          | 20 (4.1)     | 47 (9.6)      | 119 (24.2)       | 156 (31.8)                  | 149 (30.3)              |

Note: SD: standard deviation.
